# Supplementary material for: Electrochemical role of oxygen containing functional groups on activated carbon electrode
Source: Royal Society of Chemistry journal article supplement (doi:10.1039/c4ra10439k), 2014-01-01
Supplement: c4ra10439k1.pdf [file c4ra10439k1.pdf]

## Supporting Information

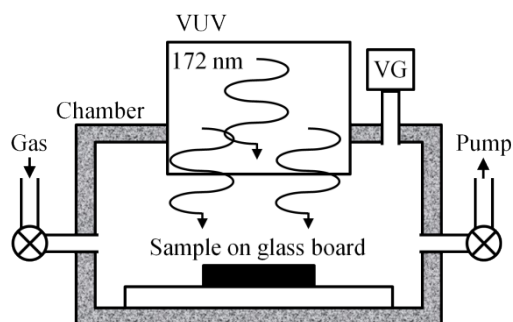

**Figure S1.** Schematic illustration of vacuum ultraviolet apparatus used in this work.  
Note that VG means vacuum gauge.

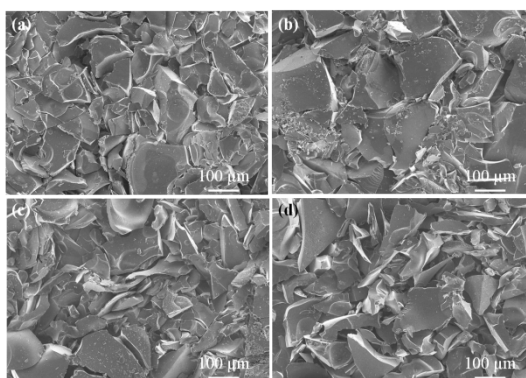

**Figure S2.** Scanning electron microscopy images of (a) the pristine, and the vacuum ultraviolet irradiated activated carbons for (b) 10, (c) 30 and (d) 60 min, respectively.

**Table S1.** Relative concentrations of oxygen-containing functional groups of the pristine and the vacuum-ultraviolet irradiated carbon nanotube for 60 min.

| Bond types | Pristine (%) | Irradiation for 60 min (%) |
|------------|--------------|----------------------------|
| C=C        | 61.7         | 47.0                       |
| C-C        | 18.2         | 14.2                       |
| C-O        | 11.3         | 11.5                       |
| C=O        | 3.1          | 10.8                       |
| O-C=O      | 5.7          | 16.5                       |

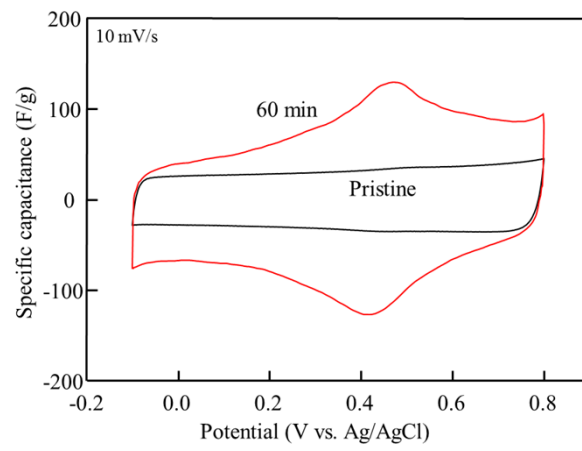

**Figure S3.** Cyclic voltammograms of the pristine and the vacuum ultraviolet irradiated carbon nanotube for 60 min.
